# Supplementary material
Source: Royal Society of Chemistry journal article supplement (doi:10.1039/d6tc00520a)
Supplement: d6tc00520a1.pdf [file d6tc00520a1.pdf]

## ELECTRONIC SUPPORTING INFORMATION

### Suppression of pyrene excimers through sulfur-bridge oxidation and steric shielding

Vignesh Rajendran<sup>a</sup>, K. R. Justin Thomas<sup>a\*</sup>

<sup>a</sup>Organic Material Laboratory, Department of Chemistry, Indian Institute of Technology Roorkee,  
Roorkee, 247667, India.

\* Corresponding author: krjt@cy.iitr.ac.in

#### Table of contents

|                 |                                                                                                                                                                                  |              |
|-----------------|----------------------------------------------------------------------------------------------------------------------------------------------------------------------------------|--------------|
|                 | <b>Instrumentation</b>                                                                                                                                                           | <b>S3</b>    |
|                 | <b>Experimental section</b>                                                                                                                                                      | <b>S4</b>    |
|                 | Density Functional Theory (DFT) calculations                                                                                                                                     | S4           |
|                 | Crystallization methods                                                                                                                                                          | S4           |
|                 | Preparation of neat film                                                                                                                                                         | S4           |
|                 | <b>Synthesis and experimental procedures</b>                                                                                                                                     | <b>S5-S7</b> |
|                 | <b>Photophysical studies</b>                                                                                                                                                     | <b>S8</b>    |
| <b>Fig. S1.</b> | (a) Absorption, (b) emission spectra of <b>PSO</b> recorded in different solvents.                                                                                               | <b>S8</b>    |
| <b>Fig. S2.</b> | (a) Absorption, (b) emission spectra of <b>PSO<sub>2</sub></b> recorded in different solvents.                                                                                   | <b>S8</b>    |
| <b>Table S1</b> | Solvatochromic data of <b>PS</b> in various solvents.                                                                                                                            | <b>S8</b>    |
| <b>Table S2</b> | Solvatochromic data of <b>PSO</b> in various solvents.                                                                                                                           | <b>S9</b>    |
| <b>Table S3</b> | Solvatochromic data of <b>PSO<sub>2</sub></b> in various solvents.                                                                                                               | <b>S9</b>    |
| <b>Table S4</b> | Solvatochromic properties of all dyes.                                                                                                                                           | <b>S9</b>    |
| <b>Fig. S3.</b> | Lifetime decay of all dyes in solids.                                                                                                                                            | <b>S10</b>   |
| <b>Table S5</b> | Lifetime decay of all dyes in solution, thin film and solid.                                                                                                                     | <b>S10</b>   |
| <b>Fig. S4.</b> | (a) AIE study of <b>PSO<sub>2</sub></b> , (b) Lifetime decay of aggregated <b>PSO</b> dye.                                                                                       | <b>S10</b>   |
| <b>Table S6</b> | Lifetime decay of all dyes in various water fractions                                                                                                                            | <b>S11</b>   |
| <b>Fig. S5.</b> | Concentration dependent emission studies of (a) <b>PS</b> , (b) <b>PSO</b> , and (c) <b>PSO<sub>2</sub></b> .                                                                    | <b>S11</b>   |
| <b>Table S7</b> | Kinetic parameter of <b>PS</b> and <b>PSO</b> in THF/H <sub>2</sub> O mixtures                                                                                                   | <b>S11</b>   |
| <b>Fig. S6.</b> | (a) Cyclic voltammetry and (b) DPV of all dyes recorded in DCM.                                                                                                                  | <b>S12</b>   |
| <b>Fig. S7.</b> | NTO analysis of all dyes depicted in state (a) T <sub>1</sub> and (b) T <sub>2</sub> state.                                                                                      | <b>S12</b>   |
| <b>Fig. S8.</b> | NTO analysis of all dyes depicted in state T <sub>3</sub> state.                                                                                                                 | <b>S13</b>   |
| <b>Fig. S9.</b> | NTO analysis of all dyes depicted in state S <sub>2</sub> and T <sub>4</sub> state.                                                                                              | <b>S13</b>   |
| <b>Table S8</b> | HOMO–LUMO fragment contributions and hole–electron distribution parameters for S <sub>1</sub> and T <sub>1</sub> states of <b>PS</b> , <b>PSO</b> , and <b>PSO<sub>2</sub></b> . | <b>S13</b>   |

|                  |                                                                                                                                                                                  |            |
|------------------|----------------------------------------------------------------------------------------------------------------------------------------------------------------------------------|------------|
| <b>Table S9</b>  | HOMO–LUMO fragment contributions and hole–electron distribution parameters for T <sub>2</sub> and T <sub>3</sub> states of <b>PS</b> , <b>PSO</b> , and <b>PSO<sub>2</sub></b> . | <b>S13</b> |
| <b>Table S10</b> | HOMO–LUMO fragment contributions and hole–electron distribution parameters for T <sub>4</sub> and T <sub>5</sub> states of <b>PS</b> , <b>PSO</b> , and <b>PSO<sub>2</sub></b> . | <b>S14</b> |
| <b>Table S11</b> | HOMO–LUMO fragment contributions and hole–electron distribution parameters for S <sub>2</sub> states of <b>PS</b> , <b>PSO</b> , and <b>PSO<sub>2</sub></b> .                    | <b>S14</b> |
|                  | <b>Crystallographic data</b>                                                                                                                                                     | <b>S14</b> |
| <b>Fig. S10.</b> | Decomposed Hirshfeld surface plots of <b>PS</b> showing contributions from (a) C···C, (b) C···H, and (c) S···H interactions.                                                     | <b>S14</b> |
| <b>Fig. S11.</b> | Decomposed Hirshfeld surface plots of <b>PSO</b> showing contributions from (a) C···C, (b) C···H, (c) S···H, and (d) O···H interactions.                                         | <b>S14</b> |
| <b>Fig. S12.</b> | Decomposed Hirshfeld surface plots of <b>PSO<sub>2</sub></b> showing contributions from (a) C···C, (b) C···H, and (c) O···H interactions.                                        | <b>S15</b> |
| <b>Table S12</b> | Crystal data and structure refinement for <b>PS</b>                                                                                                                              | <b>S15</b> |
| <b>Table S13</b> | Crystal data and structure refinement for <b>PSO</b>                                                                                                                             | <b>S16</b> |
| <b>Table S14</b> | Crystal data and structure refinement for <b>PSO<sub>2</sub></b>                                                                                                                 | <b>S17</b> |
| <b>Table S15</b> | Selected bond lengths and angles observed in <b>PS</b> , <b>PSO</b> and <b>PSO<sub>2</sub></b>                                                                                   | <b>S17</b> |
| <b>Fig. S13.</b> | <sup>1</sup> H NMR (500 MHz, CHLOROFORM- <i>D</i> ) of <b>2</b> .                                                                                                                | <b>S18</b> |
| <b>Fig. S14.</b> | <sup>1</sup> H NMR (500 MHz, CHLOROFORM- <i>D</i> ) of <b>PS</b> .                                                                                                               | <b>S19</b> |
| <b>Fig. S15.</b> | <sup>13</sup> C NMR (126 MHz, CHLOROFORM- <i>D</i> ) of <b>PS</b> .                                                                                                              | <b>S19</b> |
| <b>Fig. S16.</b> | <sup>1</sup> H NMR (500 MHz, CHLOROFORM- <i>D</i> ) of <b>PSO</b> .                                                                                                              | <b>S20</b> |
| <b>Fig. S17.</b> | <sup>13</sup> C NMR (126 MHz, CHLOROFORM- <i>D</i> ) of <b>PSO</b> .                                                                                                             | <b>S20</b> |
| <b>Fig. S18.</b> | <sup>1</sup> H NMR (500 MHz, CHLOROFORM- <i>D</i> ) of <b>PSO<sub>2</sub></b> .                                                                                                  | <b>S21</b> |
| <b>Fig. S19.</b> | <sup>13</sup> C NMR (126 MHz, CHLOROFORM- <i>D</i> ) of <b>PSO<sub>2</sub></b>                                                                                                   | <b>S21</b> |
|                  | <b>References</b>                                                                                                                                                                | <b>S22</b> |

## Instrumentation

The  $^1\text{H}$  and  $^{13}\text{C}$  NMR spectra were recorded in a JEOL 500 MHz spectrometer instrument at 298 K with  $\text{CDCl}_3$  as a deuterated solvent and TMS as an internal standard. Chemical shifts ( $\delta$ ) are reported in ppm relative to residual solvent signals  $\text{CDCl}_3$ : 7.26 ppm for  $^1\text{H}$  NMR and 77.10 ppm for  $^{13}\text{C}$  NMR. HRMS spectra were acquired on Agilent Mass Hunter Qualitative Analysis 10 Software. UV-Vis absorption spectra for all the final dyes were recorded on a Cary 100 UV-vis spectrophotometer. Fluorescence emission spectra have been recorded in the Horiba Scientific Fluoromax 4C spectrophotometer. The dyes' absolute photoluminescence quantum yield (PLQY) was determined by the calibrated integrating sphere method in the Edinburgh spectrofluorometer. The fluorescence lifetime measurements of liquid, solid, and thin film samples, including fitting, were acquired by the FLS 1000 Edinburgh instrument. FE-SEM Carl Zeiss Ultra Plus was acquired to study the morphology of aggregated samples. All data were collected from a single crystal at 103 K on a Bruker D8 QUEST FIXED CHI diffractometer with a microfocus sealed tube using a multilayer mirror as monochromator and a Bruker PHOTON III CPAD detector. The diffractometer was equipped with an Oxford Cryostream 1000 low temperature device and used  $\text{Mo } K_\alpha$  radiation ( $\lambda = 0.71073 \text{ \AA}$ ). All data were integrated with SAINT V8.42, yielding 36530 reflections of which 4943 were independent (average redundancy 7.39) and 74.0% were greater than  $2\sigma(F^2)$ . A Multi-Scan absorption correction using SADABS 2016/2 was applied. The structure was solved by Intrinsic Phasing methods with SHELXT 2018/2 and refined by full-matrix least-squares methods against  $F^2$  using SHELXL-2019/2. All non-hydrogen atoms were refined with anisotropic displacement parameters. All hydrogen atoms were refined isotropic on calculated positions using a riding model with their  $U_{\text{iso}}$  values constrained to 1.5 times the  $U_{\text{eq}}$  of their pivot atoms for terminal  $\text{sp}^3$  carbon atoms and 1.2 times for all other carbon atoms. An electrochemical analyzer with a three-electrode set up (glassy carbon as working electrode,

non- aqueous Ag/AgNO<sub>3</sub> as reference electrode, and platinum auxiliary electrode) was used to record cyclic voltammetry (CV) and differential pulse voltammetry (DPV) with ferrocene as internal standard and tetrabutylammonium perchlorate as supporting electrolyte using BASi Epsilon electrochemical analyzer. The thermal stability of dyes was observed by thermogravimetric analysis (TGA) using a Perkin–Elmer Pyris diamond analyzer instrument with a heating rate of 10°C/min and by maintaining a nitrogen atmosphere.

## Materials

All the required chemicals were purchased from the available commercial sources and used without further purification. Pyrene, *p*-toluene thiol, *m*CPBA, Cs<sub>2</sub>CO<sub>3</sub>, all other reagents and solvents were purchased and utilized without further purification from Sigma Aldrich, TCI, and SRL chemicals. All the solvents were distilled using the appropriate distillation set up for further studies. Precoated alumina plates from Merck grade were used for thin layer chromatography (TLC) analysis. All the compounds were purified using column chromatography over silica gel having mesh sizes ranging from 200-400. Caution! Precautions should be taken while handling Liq. Br<sub>2</sub> and *p*-toluenethiol as described in their SDSs.

## Experimental section

### Density Functional Theoretical Calculations

All the theoretical calculations were performed using ORCA 6.0.1 software<sup>1</sup> at the B3LYP/def2-svp level. The geometries of the lowest excited singlet (S<sub>1</sub>) and triplet (T<sub>1</sub>) states were optimized by TD-DFT. The global minima of the optimized structures were confirmed by frequency calculation on the optimized structures which showed no negative frequencies. TD-DFT calculations at the B3LYP/def2-tzvp level on the optimized structures were performed to estimate the excitation energies, singlet-triplet energy gap and other relevant parameters. Natural transition orbitals (NTO) and the charge transfer indices were calculated using a Multiwfn program.<sup>2</sup>

## Crystallization procedure

All the crystal was obtained by solvent vapor diffusion technique. For this, each final dye around 5 mg were dissolved in dry DCM and over poor solvent hexane was layered carefully at room temperature for further crystallization process.

## Preparation for thin film

All the final dyes around 2 mg were dissolved in toluene. Further drop cast on quartz plate followed slow evaporation at room temperature.

## Synthesis procedures

### Synthesis of precursors: 1

**1** was synthesized by following reported protocol.<sup>3</sup> In a 250 mL RB flask, compound pyrene (25 g, 123 mmol) was dissolved in dry MC (100 mL) and cooled at 0 °C. Afterward, AlCl<sub>3</sub> (16.5 g, 123 mmol, 1 equiv.) was added in one portion at the same temperature. Finally, dropwise *t*-BuCl (13.4 mL, 123 mmol, 1 eq) was added to the mixture under N<sub>2</sub> atm. Then, the brown mixture was shifted to room temperature and allowed to stir for 3 hours. After completing reaction hours, excess of AlCl<sub>3</sub> was quenched by adding sat. NaHCO<sub>3</sub> solution. Then, the organic phase was extracted with MC, dried over anhydrous sodium sulfate, and concentrated by rotary evaporation. Finally, the crude product was purified by column chromatography (eluant: 100% Hexane) and obtained as colourless solid having a 77% yield.

### Synthesis of precursors: 2

**2** was synthesized by following reported protocol.<sup>4</sup> In a flask, **1** (5 g, 19.35 mmol) in DCM (100 mL) was maintained at -78 °C. Afterward, Br<sub>2</sub> (0.9 mL, 17.417 mmol, 1 equiv.) in DCM (40 mL) was added dropwise to the mixture at the same temperature over 30 minutes and then stirred for 15 hours at room temperature. After completing reaction hours, the mixture was quenched by sat. Na<sub>2</sub>S<sub>2</sub>O<sub>5</sub> solution (10 mL). The precipitate was collected under a vacuum and

washed with methanol (40 mL). Finally, the crude product was washed with hexane (20 mL), which yielded the white solid (4.8 g, 60% yield), and proceeded without any further purification.  $^1\text{H}$  NMR (500 MHz,  $\text{CDCl}_3$ )  $\delta$  8.39 (d,  $J = 9.2$  Hz, 1H), 8.26 – 8.23 (m, 2H), 8.19 – 8.13 (m, 2H), 8.06 (d,  $J = 8.9$  Hz, 1H), 7.98 (t,  $J = 8.8$  Hz, 2H), 1.58 (d,  $J = 0.8$  Hz, 9H).

### Synthesis of PS

In 100 mL double neck RB flask, a **2** (1.87 g, 5.54 mmol) and *p*-toluene thiol (1 g, 8.35 mmol, 1.5 equiv.) and  $\text{Cs}_2\text{CO}_3$  (2.73 g, 8.35 mmol, 1.5 equiv.) was dissolved in 20 mL of DMF. Further, the mixture was purged with  $\text{N}_2$  over 5 minutes of stirring. Afterward, the mixture was heated at 110 °C for 15 hours at  $\text{N}_2$  atm. After the completion, the reaction mixture was brought to room temperature and poured into crushed ice. Then, the precipitate was collected and dried under a vacuum. Finally, the crude product was purified by column chromatography (eluant: 5% DCM/Hexane) and obtained as a white crystalline solid with 64% yield. Melting point 134.7 °C. IR (KBr)  $\text{cm}^{-1}$ : 3019, 2956, 2923, 2854, 1589, 796.  $^1\text{H}$  NMR (500 MHz,  $\text{CDCl}_3$ )  $\delta$  8.63 (d,  $J = 9.2$  Hz, 1H), 8.25 (s, 2H), 8.12 (d,  $J = 9.3$  Hz, 1H), 8.10 – 8.05 (m, 3H), 8.04 – 8.01 (m, 1H), 7.17 – 7.12 (m, 2H), 7.08 – 7.02 (m, 2H), 2.30 (s, 3H).  $^{13}\text{C}$  NMR (125 MHz,  $\text{CDCl}_3$ )  $\delta$  149.45, 136.20, 133.69, 131.62, 131.13 (d,  $J = 10.6$  Hz), 130.83, 129.90, 129.48, 128.90, 128.54, 128.09, 127.08, 124.94, 124.64, 122.72 (d,  $J = 12.2$  Hz), 35.22, 31.88, 20.98. HRMS Calculated mass  $\text{C}_{27}\text{H}_{24}\text{S}$  ( $\text{M}^+$ ): 380.1613, Exact mass  $\text{C}_{27}\text{H}_{24}\text{OS}$  ( $\text{M}^+$ ): 380.1606.

### Synthesis of PSO

In a 100 mL RB flask, a compound **PS** (200 mg, 0.52 mmol) was dissolved in 10 mL of DCM at 0 °C. Afterward, *m*CPBA (108 mg, 0.60 mmol, 1.2 equiv.) was added slowly to the mixture at the same temperature. Further, the resultant mixture was stirred at 0 °C for 30 minutes. Afterward, the mixture was quenched with sat.  $\text{K}_2\text{CO}_3$  solution. Then, the organic layer was extracted by DCM and dried over anhydrous sodium sulfate. Finally, the crude product was purified by column chromatography (eluant: 80% DCM/Hexane) and obtained as a light green solid with a yield of (200 mg) 96%. Melting point 205.1 °C. IR (KBr)  $\text{cm}^{-1}$ : 3013, 2963, 2921,

2854, 1590, 1081, 1055, 804.  $^1\text{H}$  NMR (500 MHz,  $\text{CDCl}_3$ )  $\delta$  8.55 (dd,  $J = 15.0, 8.6$  Hz, 2H), 8.30 – 8.25 (m, 3H), 8.15 (dd,  $J = 14.1, 9.1$  Hz, 2H), 8.05 (d,  $J = 8.9$  Hz, 1H), 7.57 (d,  $J = 8.3$  Hz, 2H), 7.16 (dt,  $J = 8.0, 0.7$  Hz, 2H), 2.28 (s, 3H), 1.58 (s, 9H).  $^{13}\text{C}$  NMR (125 MHz,  $\text{CDCl}_3$ )  $\delta$  149.90, 142.66, 141.18, 137.29, 133.05, 130.97, 130.24, 129.90, 129.41 (d,  $J = 5.5$  Hz), 127.07, 125.15 (d,  $J = 33.8$  Hz), 123.63 (d,  $J = 19.9$  Hz), 121.82, 121.22, 35.28, 31.84, 21.27. HRMS Calculated mass  $\text{C}_{27}\text{H}_{24}\text{OS}$  ( $\text{M}+\text{H}$ ) $^+$ : 397.1626, Exact mass  $\text{C}_{27}\text{H}_{24}\text{OS}$  ( $\text{M}+\text{H}$ ) $^+$ : 397.1632.

### Synthesis of $\text{PSO}_2$

In a 100 mL RB flask, a compound **PS** (500 mg, 1.31 mmol) was dissolved in 20 mL of DCM at 0 °C. Afterward, *m*CPBA (1.1 g, 6.50 mmol, 5 equiv.) was added slowly to the mixture at the same temperature. Further, the resultant mixture was stirred at 0 °C for 1 hour. Afterward, the mixture was quenched with sat.  $\text{K}_2\text{CO}_3$  solution. Then, the organic layer was extracted by DCM and dried over anhydrous sodium sulfate. Finally, the crude product was purified by column chromatography (eluant: 95% DCM/Hexane) and obtained as a light green solid with a yield of (410 mg) 75%. Melting point 327.3 °C. IR (KBr)  $\text{cm}^{-1}$ : 3036, 2956, 2922, 2859, 1585, 1155, 1126, 665.  $^1\text{H}$  NMR (500 MHz,  $\text{CDCl}_3$ )  $\delta$  8.96 (d,  $J = 9.4$  Hz, 1H), 8.88 (d,  $J = 8.2$  Hz, 1H), 8.33 – 8.28 (m, 2H), 8.25 (d,  $J = 8.3$  Hz, 1H), 8.19 (dd,  $J = 9.2, 4.7$  Hz, 2H), 8.07 (d,  $J = 8.9$  Hz, 1H), 7.92 – 7.85 (m, 2H), 7.22 (dd,  $J = 8.5, 0.7$  Hz, 2H), 2.31 (s, 3H), 1.57 (s, 9H).  $^{13}\text{C}$  NMR (125 MHz,  $\text{CDCl}_3$ )  $\delta$  151.22, 144.32, 138.76, 133.18, 131.99, 129.88, 127.62, 126.38, 122.59, 35.34, 31.68, 21.52. HRMS Calculated mass  $\text{C}_{27}\text{H}_{24}\text{O}_2\text{S}$  ( $\text{M}^+$ ): 412.1497, Exact mass  $\text{C}_{27}\text{H}_{24}\text{O}_2\text{S}$  ( $\text{M}^+$ ): 412.1488.

## Photophysical studies

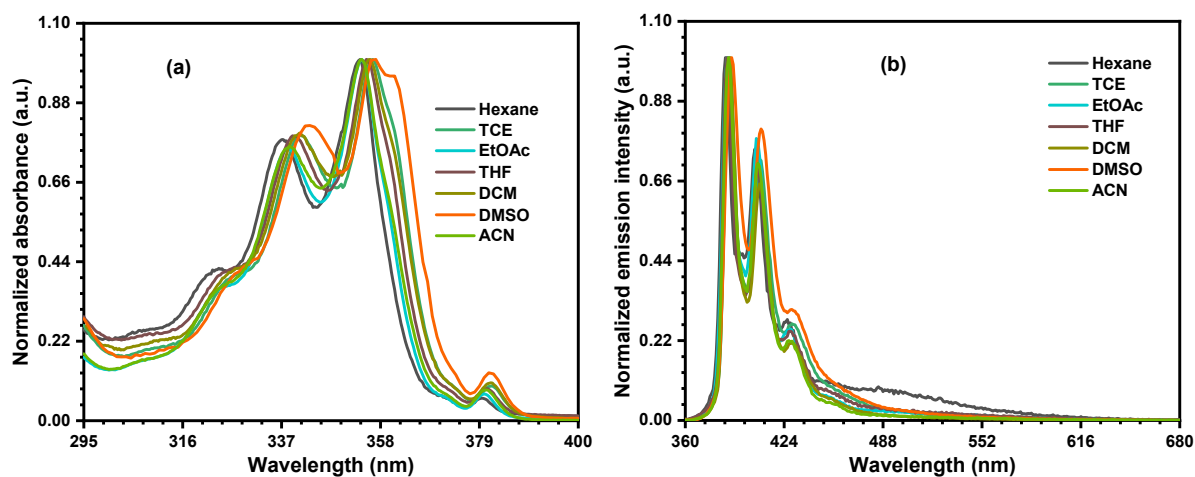

Fig. S1. (a) Absorption, (b) emission spectra of **PSO** recorded in different solvents.

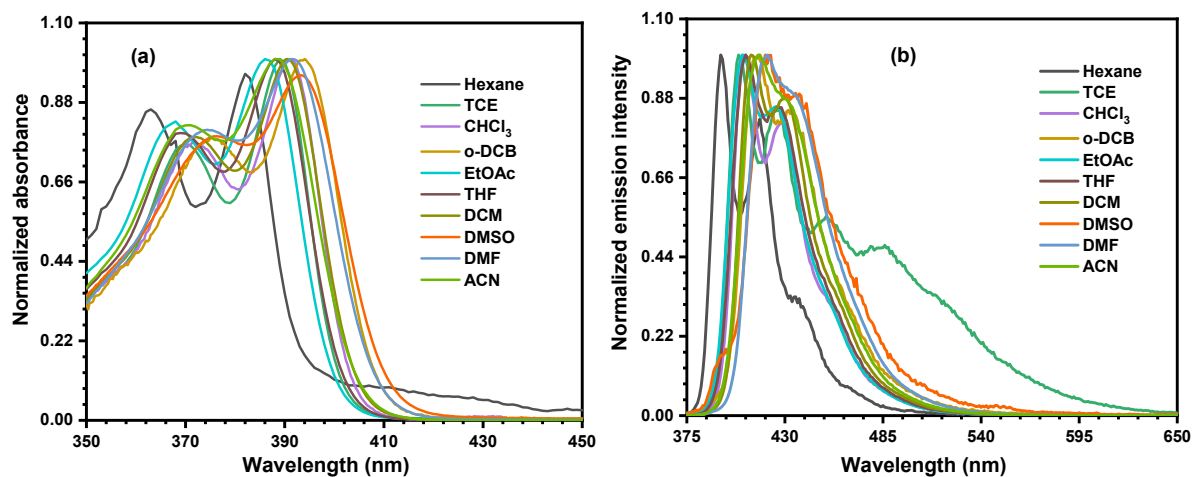

Fig. S2. (a) Absorption, (b) emission spectra of **PSO<sub>2</sub>** recorded in different solvents.

Table S1. Solvatochromic data of **PS** in various solvents.

| Solvent      | $E_T^N$ | Orientation    |                | $\lambda_{\text{abs}}$ (nm) | $\lambda_{\text{em}}$ (nm) | Stokes Shift (nm) | $\Delta\nu$ (cm <sup>-1</sup> ) |
|--------------|---------|----------------|----------------|-----------------------------|----------------------------|-------------------|---------------------------------|
|              |         | Polarizability | ( $\Delta f$ ) |                             |                            |                   |                                 |
| Hex          | 0.009   | 0.012          |                | 353                         | 385                        | 32                | 2354.58                         |
| Tol          | 0.099   | 0.014          |                | 356                         | 388                        | 32                | 2316.69                         |
| TEA          | 0.043   | 0.045          |                | 354                         | 388                        | 34                | 2475.39                         |
| TCE          | 0.160   | 0.085          |                | 356                         | 389                        | 33                | 2382.94                         |
| <i>o</i> DCB | 0.225   | 0.186          |                | 357                         | 391                        | 34                | 2435.75                         |
| EtOAc        | 0.228   | 0.199          |                | 353                         | 387                        | 34                | 2488.81                         |
| THF          | 0.207   | 0.210          |                | 355                         | 388                        | 33                | 2395.81                         |
| DMSO         | 0.444   | 0.263          |                | 356                         | 391                        | 35                | 2514.44                         |
| DMF          | 0.386   | 0.276          |                | 355                         | 389                        | 34                | 2462.07                         |
| ACN          | 0.460   | 0.305          |                | 354                         | 389                        | 35                | 2541.64                         |

**Table S2.** Solvatochromic data of **PSO** in various solvents.

| Solvent | $E_T^N$ | Orientation                   |  | $\lambda_{\text{abs}}$ (nm) | $\lambda_{\text{em}}$ (nm) | Stokes Shift (nm) | $\Delta\nu$ (cm <sup>-1</sup> ) |
|---------|---------|-------------------------------|--|-----------------------------|----------------------------|-------------------|---------------------------------|
|         |         | Polarizability ( $\Delta f$ ) |  |                             |                            |                   |                                 |
| Hex     | 0.009   | 0.012                         |  | 350                         | 396                        | 46                | 3318.90                         |
| TCE     | 0.160   | 0.085                         |  | 354                         | 401                        | 47                | 3310.93                         |
| EtOAc   | 0.228   | 0.199                         |  | 352                         | 399                        | 47                | 3346.43                         |
| THF     | 0.207   | 0.210                         |  | 353                         | 400                        | 47                | 3328.61                         |
| DCM     | 0.309   | 0.217                         |  | 353                         | 420                        | 67                | 4519.08                         |
| DMSO    | 0.444   | 0.263                         |  | 356                         | 422                        | 66                | 4393.20                         |
| ACN     | 0.460   | 0.305                         |  | 366                         | 594                        | 228               | 10487.3                         |

**Table S3.** Solvatochromic data of **PSO<sub>2</sub>** in various solvents.

| Solvent           | $E_T^N$ | Orientation                   |  | $\lambda_{\text{abs}}$ (nm) | $\lambda_{\text{em}}$ (nm) | Stokes Shift (nm) | $\Delta\nu$ (cm <sup>-1</sup> ) |
|-------------------|---------|-------------------------------|--|-----------------------------|----------------------------|-------------------|---------------------------------|
|                   |         | Polarizability ( $\Delta f$ ) |  |                             |                            |                   |                                 |
| Hex               | 0.009   | 0.012                         |  | 383                         | 394                        | 11                | 728.94                          |
| TCE               | 0.160   | 0.085                         |  | 389                         | 404                        | 15                | 954.46                          |
| CHCl <sub>3</sub> | 0.259   | 0.149                         |  | 391                         | 407                        | 16                | 1005.42                         |
| oDCB              | 0.225   | 0.186                         |  | 393                         | 413                        | 20                | 1232.21                         |
| EtOAc             | 0.228   | 0.199                         |  | 386                         | 406                        | 20                | 1276.19                         |
| THF               | 0.207   | 0.210                         |  | 389                         | 408                        | 19                | 1197.13                         |
| DCM               | 0.309   | 0.217                         |  | 390                         | 411                        | 21                | 1310.12                         |
| DMSO              | 0.444   | 0.263                         |  | 393                         | 420                        | 27                | 1635.76                         |
| DMF               | 0.386   | 0.276                         |  | 391                         | 420                        | 29                | 1765.92                         |
| ACN               | 0.460   | 0.305                         |  | 388                         | 415                        | 27                | 1676.81                         |

**Table S4.** Solvatochromic properties of all dyes.

| Dye              | Chemical formula                                 | $R^2$ | Onsager radius      | Slope     | $\Delta\mu$ |
|------------------|--------------------------------------------------|-------|---------------------|-----------|-------------|
| PS               | C <sub>27</sub> H <sub>24</sub> S                | 0.88  | 4.36 Å <sup>0</sup> | 1579.559  | 3.61 D      |
| PS               | C <sub>27</sub> H <sub>24</sub> S                | 0.96  | 4.36 Å <sup>0</sup> | 12404.338 | 10.13 D     |
| PSO              | C <sub>27</sub> H <sub>24</sub> SO               | 0.93  | 4.40 Å <sup>0</sup> | 633.4935  | 2.31 D      |
| PSO <sub>2</sub> | C <sub>27</sub> H <sub>24</sub> O <sub>2</sub> S | 0.89  | 4.46 Å <sup>0</sup> | 3471.5291 | 5.53 D      |

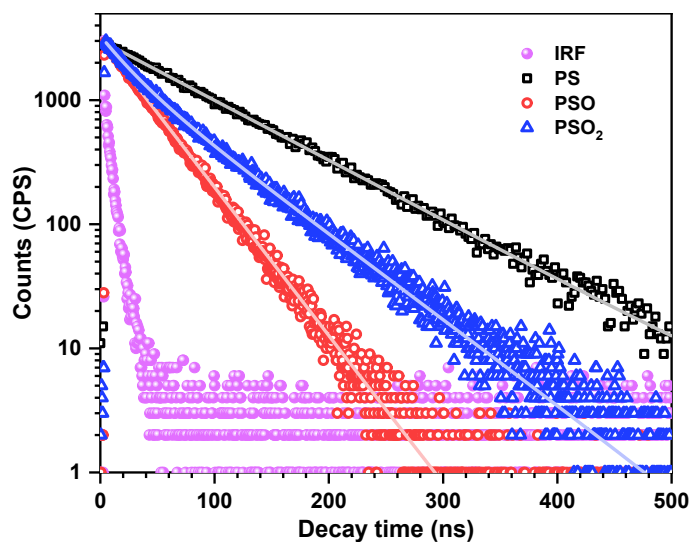

Figure S3. Lifetime decay of all dyes in solids.

Table S5. Lifetime decay of all dyes in solution, thin film and solid.

|           | Dyes             | $\tau_1$<br>(ns) | $\tau_2$<br>(ns) | Average $\tau$<br>(ns) | $\chi^2$ |
|-----------|------------------|------------------|------------------|------------------------|----------|
| Solution  | PS               | 1.75             | -                | 1.75                   | 1.0      |
|           | PSO              | 1.34             | -                | 1.34                   | 0.95     |
|           | PSO <sub>2</sub> | 3.30             | -                | 3.30                   | 0.99     |
| Thin film | PS               | 13.99            | 26.51            | 21.35                  | 1.08     |
|           | PSO              | 8.61             | 25.57            | 22.25                  | 1.12     |
|           | PSO <sub>2</sub> | 25.0             | 70.29            | 68.16                  | 1.10     |
| Solid     | PS               | 89.86            | -                | 89.86                  | 1.03     |
|           | PSO              | 36.3             | -                | 36.3                   | 0.90     |
|           | PSO <sub>2</sub> | 24.04            | 63.02            | 55.93                  | 1.10     |

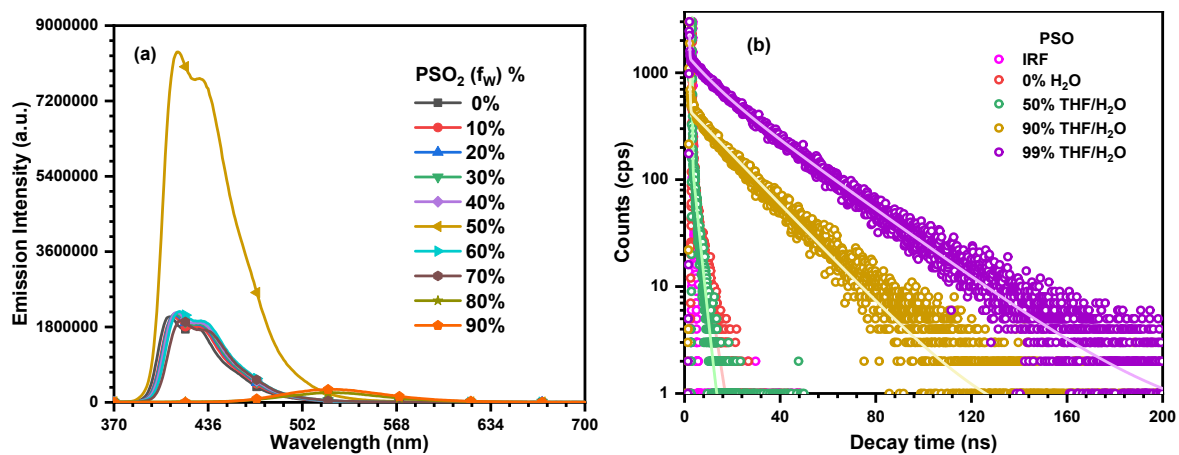

**Figure S4.** (a) AIE study of **PSO<sub>2</sub>**, (b) Lifetime decay of aggregated **PSO** dye.

**Table S6.** Lifetime decay of all dyes in various water fractions

| Compound               | Fraction                 | $\tau$ (ns) | $\chi^2$ |
|------------------------|--------------------------|-------------|----------|
| <b>PS</b>              | 0% H <sub>2</sub> O      | 1.7548      | 1.0153   |
|                        | 50% THF/H <sub>2</sub> O | 2.1308      | 1.0263   |
|                        | 90% THF/H <sub>2</sub> O | 12.0375     | 1.0132   |
|                        | 99% THF/H <sub>2</sub> O | 22.7001     | 1.0795   |
| <b>PSO</b>             | 0% H <sub>2</sub> O      | 1.3416      | 1.0767   |
|                        | 50% THF/H <sub>2</sub> O | 0.9523      | 0.9649   |
|                        | 90% THF/H <sub>2</sub> O | 17.9838     | 1.0525   |
|                        | 99% THF/H <sub>2</sub> O | 24.3942     | 1.0977   |
| <b>PSO<sub>2</sub></b> | 0% H <sub>2</sub> O      | 3.3004      | 1.0222   |
|                        | 50% THF/H <sub>2</sub> O | 3.2814      | 1.0101   |
|                        | 90% THF/H <sub>2</sub> O | 72.8975     | 0.9742   |
|                        | 99% THF/H <sub>2</sub> O | 65.0691     | 0.9459   |

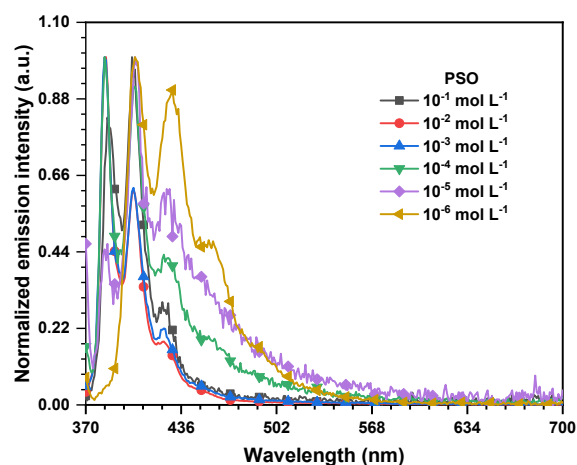

**Figure S5.** Concentration dependent emission of **PSO**.

**Table S7.** Kinetic parameter of all dyes in various water fractions

| Compound   | Fraction                 | PLQYs (%) | $\tau$ (ns) | $K_r$ (s)                         | $k_{nr}$ (s)                      |
|------------|--------------------------|-----------|-------------|-----------------------------------|-----------------------------------|
| <b>PS</b>  | 0% H <sub>2</sub> O      | 18.09     | 1.75        | $1.03 \times 10^8 \text{ s}^{-1}$ | $4.68 \times 10^8 \text{ s}^{-1}$ |
|            | 99% THF/H <sub>2</sub> O | 85.19     | 22.70       | $3.75 \times 10^7 \text{ s}^{-1}$ | $6.52 \times 10^7 \text{ s}^{-1}$ |
| <b>PSO</b> | 0% H <sub>2</sub> O      | 14.25     | 1.34        | $1.06 \times 10^8 \text{ s}^{-1}$ | $6.40 \times 10^8 \text{ s}^{-1}$ |
|            | 99% THF/H <sub>2</sub> O | 78.58     | 24.39       | $3.23 \times 10^7 \text{ s}^{-1}$ | $8.82 \times 10^6 \text{ s}^{-1}$ |

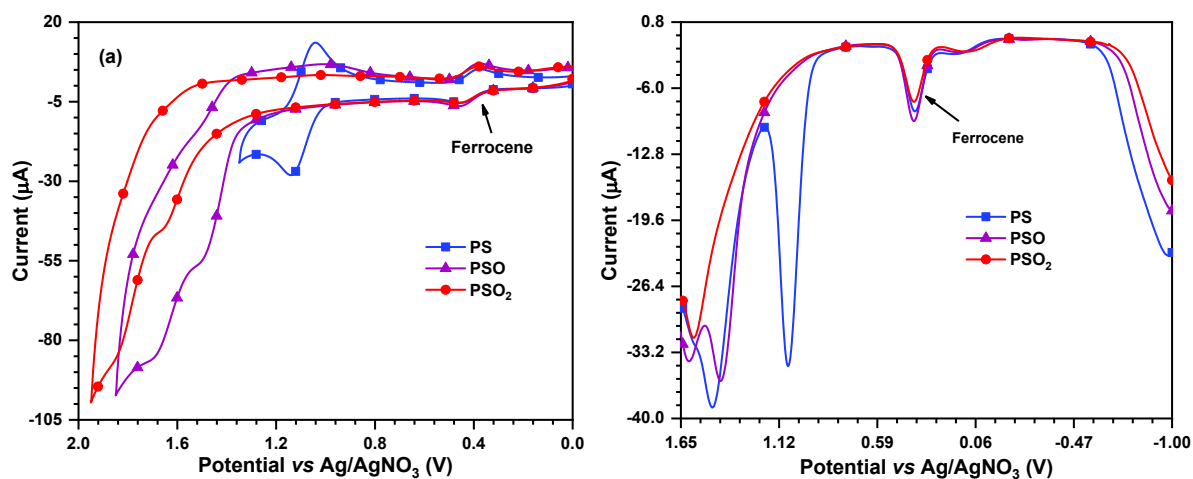

**Figure S6.** (a) Cyclic voltammety and (b) DPV of all dyes recorded in DCM.

## Theoretical studies

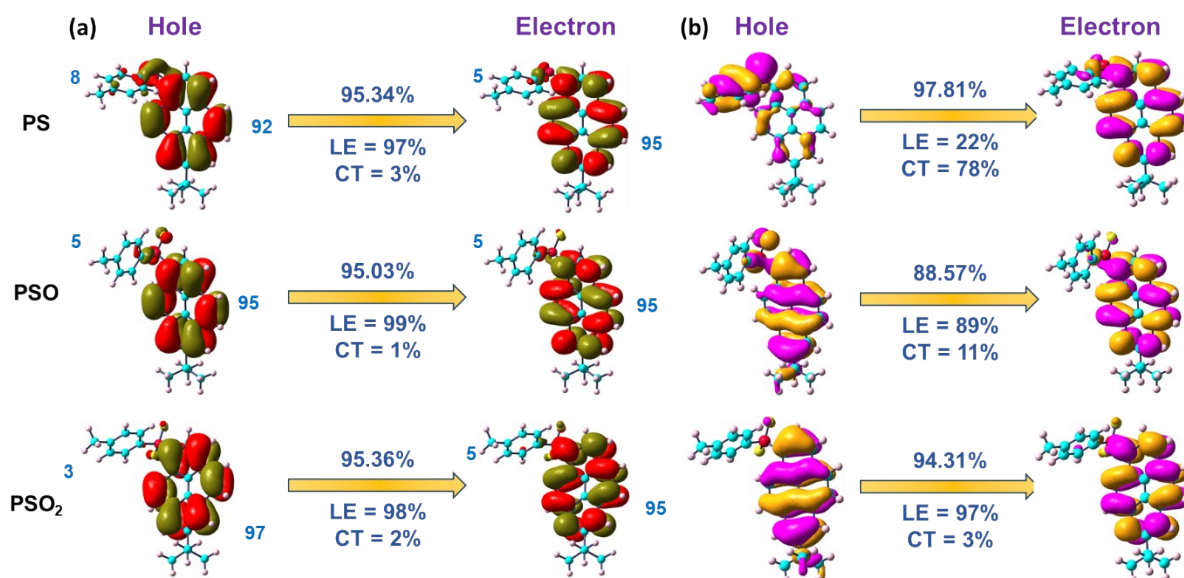

**Figure S7.** NTO analysis of all dyes depicted in state (a)  $T_1$  and (b)  $T_2$  state.

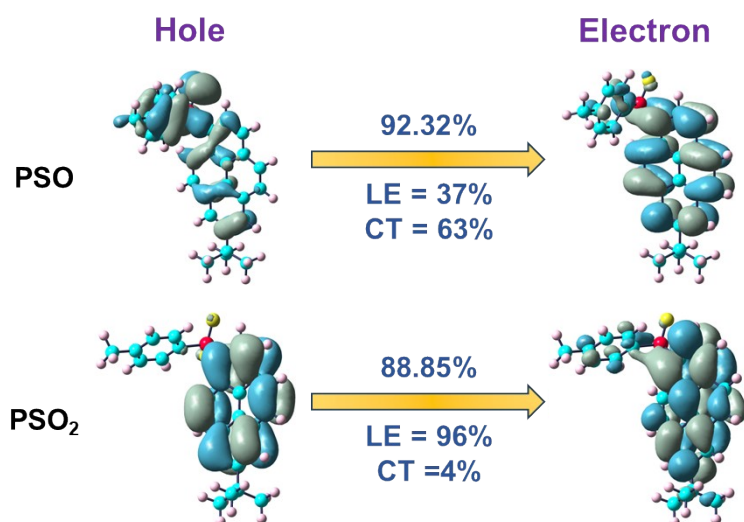

**Figure S8.** NTO analysis of all dyes depicted in state  $T_3$  state.

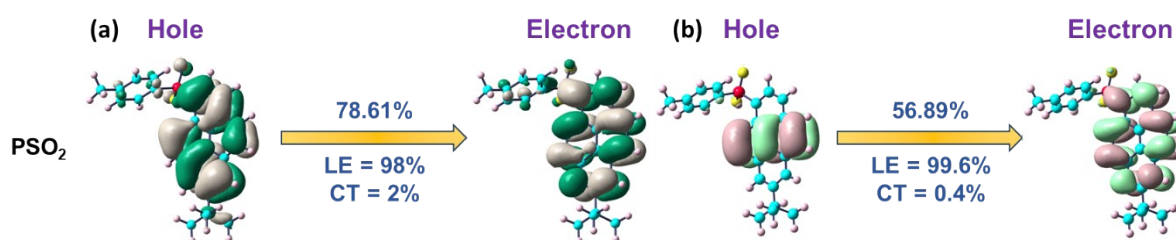

**Figure S9.** NTO analysis of all dyes depicted in state  $S_2$  and  $T_4$  state.

**Table S8.** HOMO–LUMO fragment contributions and hole–electron distribution parameters for  $S_1$  and  $T_1$  states of **PS**, **PSO**, and **PSO<sub>2</sub>**.

| Compound         | Fragment | HOMO   | LUMO   | $S_1$ |          |       |       | $T_1$ |          |      |       |
|------------------|----------|--------|--------|-------|----------|-------|-------|-------|----------|------|-------|
|                  |          |        |        | HOLE  | ELECTRON | %CT   | %LE   | HOLE  | ELECTRON | %CT  | %LE   |
| PS               | C1-C37   | 58.114 | 41.885 | 13.48 | 93.66    | 80.18 | 19.81 | 91.54 | 94.90    | 3.35 | 96.64 |
|                  | C38-C52  | 94.858 | 5.137  | 86.52 | 6.34     |       |       | 8.46  | 5.10     |      |       |
| PSO              | C1-C37   | 88.755 | 11.228 | 27.93 | 94.10    | 66.17 | 33.82 | 94.58 | 95.34    | 0.75 | 99.24 |
|                  | C38-C53  | 94.804 | 5.175  | 72.07 | 5.90     |       |       | 5.42  | 4.66     |      |       |
| PSO <sub>2</sub> | C1-C37   | 96.191 | 3.801  | 96.91 | 88.66    | 8.26  | 91.73 | 96.56 | 94.66    | 1.89 | 98.10 |
|                  | C38-C54  | 92.775 | 7.216  | 3.23  | 11.49    |       |       | 3.44  | 5.34     |      |       |

**Table S9.** HOMO–LUMO fragment contributions and hole–electron distribution parameters for  $T_2$  and  $T_3$  states of **PS**, **PSO**, and **PSO<sub>2</sub>**.

| Compound         | Fragment | $T_2$ |          |       |       | $T_3$ |          |       |       |
|------------------|----------|-------|----------|-------|-------|-------|----------|-------|-------|
|                  |          | HOLE  | ELECTRON | %CT   | %LE   | HOLE  | ELECTRON | %CT   | %LE   |
| PS               | C1-C37   | 15.50 | 94.00    | 78.49 | 21.50 | 95.61 | 97.27    | 1.65  | 98.34 |
|                  | C38-C52  | 84.50 | 6.00     |       |       | 4.39  | 2.73     |       |       |
| PSO              | C1-C37   | 85.96 | 96.62    | 10.66 | 89.33 | 28.58 | 92.01    | 63.42 | 36.57 |
|                  | C38-C53  | 14.04 | 3.38     |       |       | 71.42 | 7.99     |       |       |
| PSO <sub>2</sub> | C1-C37   | 99.18 | 96.17    | 3.00  | 96.99 | 97.39 | 93.83    | 3.56  | 96.43 |
|                  | C38-C54  | 0.82  | 3.83     |       |       | 2.61  | 6.17     |       |       |

**Table S10.** HOMO–LUMO fragment contributions and hole–electron distribution parameters for  $T_4$  and  $T_5$  states of **PS**, **PSO**, and **PSO<sub>2</sub>**.

| Compound               | Fragment | $T_4$ |          |      |       | $T_5$ |          |      |       |
|------------------------|----------|-------|----------|------|-------|-------|----------|------|-------|
|                        |          | HOLE  | ELECTRON | %CT  | %LE   | HOLE  | ELECTRON | %CT  | %LE   |
| <b>PSO</b>             | C1-C37   | 94.75 | 97.52    | 2.77 | 97.22 | 98.63 | 98.58    | 0.04 | 99.95 |
|                        | C38-C53  | 5.25  | 2.48     |      |       | 1.37  | 1.42     |      |       |
| <b>PSO<sub>2</sub></b> | C1-C37   | 97.95 | 97.89    | 0.06 | 99.94 | 48.62 | 49.01    | 0.38 | 99.61 |
|                        | C38-C54  | 2.05  | 2.11     |      |       | 51.38 | 50.99    |      |       |

**Table S11.** HOMO–LUMO fragment contributions and hole–electron distribution parameters for  $S_2$  states of **PS**, **PSO**, and **PSO<sub>2</sub>**.

| Compound               | Fragment | $S_2$ |          |      |       |
|------------------------|----------|-------|----------|------|-------|
|                        |          | HOLE  | ELECTRON | %CT  | %LE   |
| <b>PSO<sub>2</sub></b> | C1-C37   | 95.03 | 93.25    | 1.77 | 98.22 |
|                        | C38-C54  | 4.97  | 6.75     |      |       |

## Crystallographic data

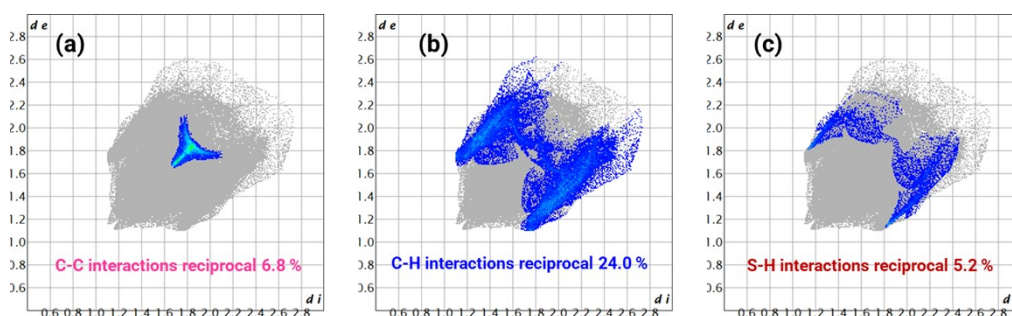

**Figure S10.** Decomposed Hirshfeld surface plots of **PS** showing contributions from (a)  $C\cdots C$ , (b)  $C\cdots H$ , and (c)  $S\cdots H$  interactions.

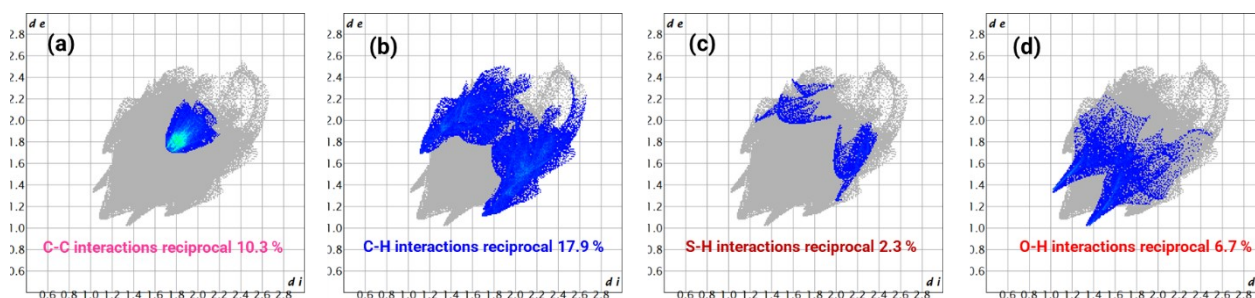

**Figure S11.** Decomposed Hirshfeld surface plots of **PSO** showing contributions from (a)  $C\cdots C$ , (b)  $C\cdots H$ , (c)  $S\cdots H$ , and (d)  $O\cdots H$  interactions.

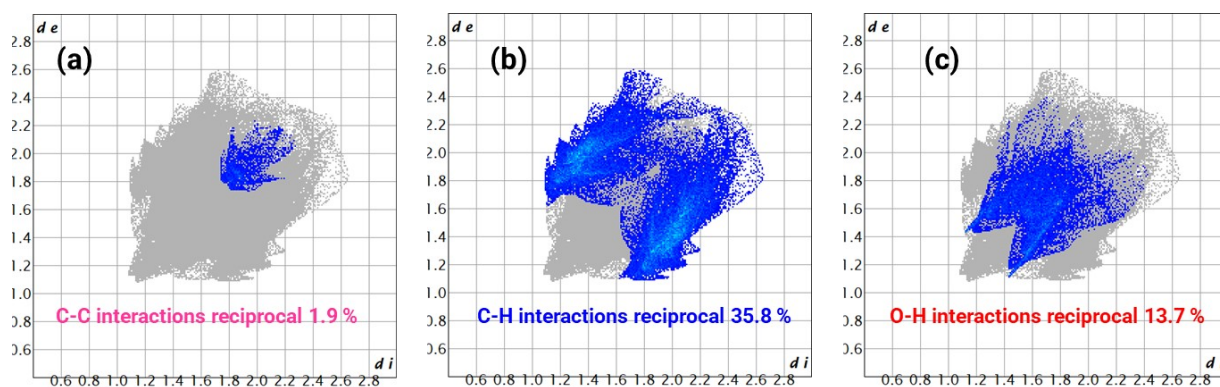

**Figure S12.** Decomposed Hirshfeld surface plots of  $\text{PSO}_2$  showing contributions from (a)  $\text{C}\cdots\text{C}$ , (b)  $\text{C}\cdots\text{H}$ , and (c)  $\text{O}\cdots\text{H}$  interactions.

**Table S12.** Crystal data and structure refinement for **PS**

|                                               |                                                               |
|-----------------------------------------------|---------------------------------------------------------------|
| CCDC No                                       | 2530247                                                       |
| Empirical formula                             | $\text{C}_{27}\text{H}_{24}\text{S}$                          |
| Formula weight                                | 380.52                                                        |
| Temperature/K                                 | 100.00                                                        |
| Crystal system                                | monoclinic                                                    |
| Space group                                   | $\text{P2}_1/\text{c}$                                        |
| $a/\text{\AA}$                                | 11.874(2)                                                     |
| $b/\text{\AA}$                                | 10.5176(18)                                                   |
| $c/\text{\AA}$                                | 16.424(3)                                                     |
| $\alpha/^\circ$                               | 90                                                            |
| $\beta/^\circ$                                | 98.126(5)                                                     |
| $\gamma/^\circ$                               | 90                                                            |
| Volume/ $\text{\AA}^3$                        | 2030.5(6)                                                     |
| Z                                             | 4                                                             |
| $\rho_{\text{calc}}/\text{g/cm}^3$            | 1.245                                                         |
| $\mu/\text{mm}^{-1}$                          | 0.169                                                         |
| F(000)                                        | 808.0                                                         |
| Crystal size/ $\text{mm}^3$                   | $0.238 \times 0.083 \times 0.035$                             |
| Radiation                                     | $\text{MoK}\alpha$ ( $\lambda = 0.71073$ )                    |
| $2\theta$ range for data collection/ $^\circ$ | 3.464 to 52.988                                               |
| Index ranges                                  | $-14 \leq h \leq 14, -13 \leq k \leq 13, -20 \leq l \leq 20$  |
| Reflections collected                         | 42661                                                         |
| Independent reflections                       | 4211 [ $R_{\text{int}} = 0.0654, R_{\text{sigma}} = 0.0343$ ] |
| Data/restraints/parameters                    | 4211/0/257                                                    |
| Goodness-of-fit on $F^2$                      | 1.061                                                         |
| Final R indexes [ $I \geq 2\sigma(I)$ ]       | $R_1 = 0.0412, wR_2 = 0.1048$                                 |
| Final R indexes [all data]                    | $R_1 = 0.0482, wR_2 = 0.1115$                                 |
| Largest diff. peak/hole / $e \text{\AA}^{-3}$ | 0.32/-0.22                                                    |

**Table S13.** Crystal data and structure refinement for **PSO**

|                                                                 |                                                                                |
|-----------------------------------------------------------------|--------------------------------------------------------------------------------|
| CCDC number                                                     | 2530815                                                                        |
| Empirical formula                                               | C <sub>27</sub> H <sub>24</sub> OS                                             |
| Formula weight                                                  | 396.52                                                                         |
| Temperature [K]                                                 | 103(2)                                                                         |
| Crystal system                                                  | monoclinic                                                                     |
| Space group (number)                                            | <i>P</i> 2 <sub>1</sub> / <i>n</i> (14)                                        |
| <i>a</i> [Å]                                                    | 7.4237(3)                                                                      |
| <i>b</i> [Å]                                                    | 29.7475(12)                                                                    |
| <i>c</i> [Å]                                                    | 9.1816(4)                                                                      |
| $\alpha$ [°]                                                    | 90                                                                             |
| $\beta$ [°]                                                     | 90.311(2)                                                                      |
| $\gamma$ [°]                                                    | 90                                                                             |
| Volume [Å <sup>3</sup> ]                                        | 2027.60(15)                                                                    |
| <i>Z</i>                                                        | 4                                                                              |
| $\rho_{\text{calc}}$ [gcm <sup>-3</sup> ]                       | 1.299                                                                          |
| $\mu$ [mm <sup>-1</sup> ]                                       | 0.176                                                                          |
| <i>F</i> (000)                                                  | 840                                                                            |
| Crystal size [mm <sup>3</sup> ]                                 | 0.093×0.134×0.203                                                              |
| Crystal colour                                                  | colourless                                                                     |
| Crystal shape                                                   | block                                                                          |
| Radiation                                                       | Mo <i>K</i> <sub>α</sub> ( $\lambda$ =0.71073 Å)                               |
| 2 $\theta$ range [°]                                            | 5.21 to 56.26 (0.75 Å)                                                         |
| Index ranges                                                    | -9 ≤ <i>h</i> ≤ 9<br>-39 ≤ <i>k</i> ≤ 33<br>-10 ≤ <i>l</i> ≤ 12                |
| Reflections collected                                           | 36530                                                                          |
| Independent reflections                                         | 4943<br><i>R</i> <sub>int</sub> = 0.0678<br><i>R</i> <sub>sigma</sub> = 0.0523 |
| Completeness to<br>$\theta = 25.242^\circ$                      | 99.8                                                                           |
| Data / Restraints / Parameters                                  | 4943 / 0 / 266                                                                 |
| Goodness-of-fit on <i>F</i> <sup>2</sup>                        | 1.033                                                                          |
| Final <i>R</i> indexes<br>[ <i>I</i> ≥ 2 $\sigma$ ( <i>I</i> )] | <i>R</i> <sub>1</sub> = 0.0596<br><i>wR</i> <sub>2</sub> = 0.1497              |
| Final <i>R</i> indexes<br>[all data]                            | <i>R</i> <sub>1</sub> = 0.0828<br><i>wR</i> <sub>2</sub> = 0.1656              |
| Largest peak/hole [eÅ <sup>-3</sup> ]                           | 1.12/-0.40                                                                     |

**Table S14.** Crystal data and structure refinement for **PSO<sub>2</sub>**

|                   |                                                  |
|-------------------|--------------------------------------------------|
| CCDC No           | 2530246                                          |
| Empirical formula | C <sub>27</sub> H <sub>24</sub> O <sub>2</sub> S |
| Formula weight    | 412.52                                           |

|                                             |                                                               |
|---------------------------------------------|---------------------------------------------------------------|
| Temperature/K                               | 100.00                                                        |
| Crystal system                              | orthorhombic                                                  |
| Space group                                 | Pbca                                                          |
| a/Å                                         | 18.3088(9)                                                    |
| b/Å                                         | 6.8770(3)                                                     |
| c/Å                                         | 32.6593(16)                                                   |
| $\alpha$ /°                                 | 90                                                            |
| $\beta$ /°                                  | 90                                                            |
| $\gamma$ /°                                 | 90                                                            |
| Volume/Å <sup>3</sup>                       | 4112.1(3)                                                     |
| Z                                           | 8                                                             |
| $\rho_{\text{calc}}/\text{cm}^3$            | 1.333                                                         |
| $\mu/\text{mm}^{-1}$                        | 0.179                                                         |
| F(000)                                      | 1744.0                                                        |
| Crystal size/mm <sup>3</sup>                | 0.424 × 0.038 × 0.037                                         |
| Radiation                                   | MoK $\alpha$ ( $\lambda$ = 0.71073)                           |
| 2 $\Theta$ range for data collection/°      | 2.494 to 52.74                                                |
| Index ranges                                | -22 ≤ h ≤ 22, -8 ≤ k ≤ 8, -40 ≤ l ≤ 40                        |
| Reflections collected                       | 49108                                                         |
| Independent reflections                     | 4219 [R <sub>int</sub> = 0.0595, R <sub>sigma</sub> = 0.0303] |
| Data/restraints/parameters                  | 4219/0/275                                                    |
| Goodness-of-fit on F <sup>2</sup>           | 1.086                                                         |
| Final R indexes [I ≥ 2 $\sigma$ (I)]        | R <sub>1</sub> = 0.0414, wR <sub>2</sub> = 0.1063             |
| Final R indexes [all data]                  | R <sub>1</sub> = 0.0499, wR <sub>2</sub> = 0.1135             |
| Largest diff. peak/hole / e Å <sup>-3</sup> | 0.42/-0.30                                                    |

**Table S15.** Selected bond lengths and angles observed in **PS**, **PSO** and **PSO<sub>2</sub>**

| Compound               | C-S, Å     | S=O, Å     | C-S-C, °             | C-S-C-C, °             |
|------------------------|------------|------------|----------------------|------------------------|
| <b>PS</b>              | 1.7715(12) | -          | 103.47(6), 106.33(6) | -100.57(10), 84.24(11) |
| <b>PSO</b>             | 1.794(2)   | 1.4806(18) | 98.55(10)            | 146.12(18), -39.5(2)   |
| <b>PSO<sub>2</sub></b> | 1.7747(16) | 1.4415(12) | 105.62(8)            | -113.49(14), 69.27(14) |

# NMR Spectrum

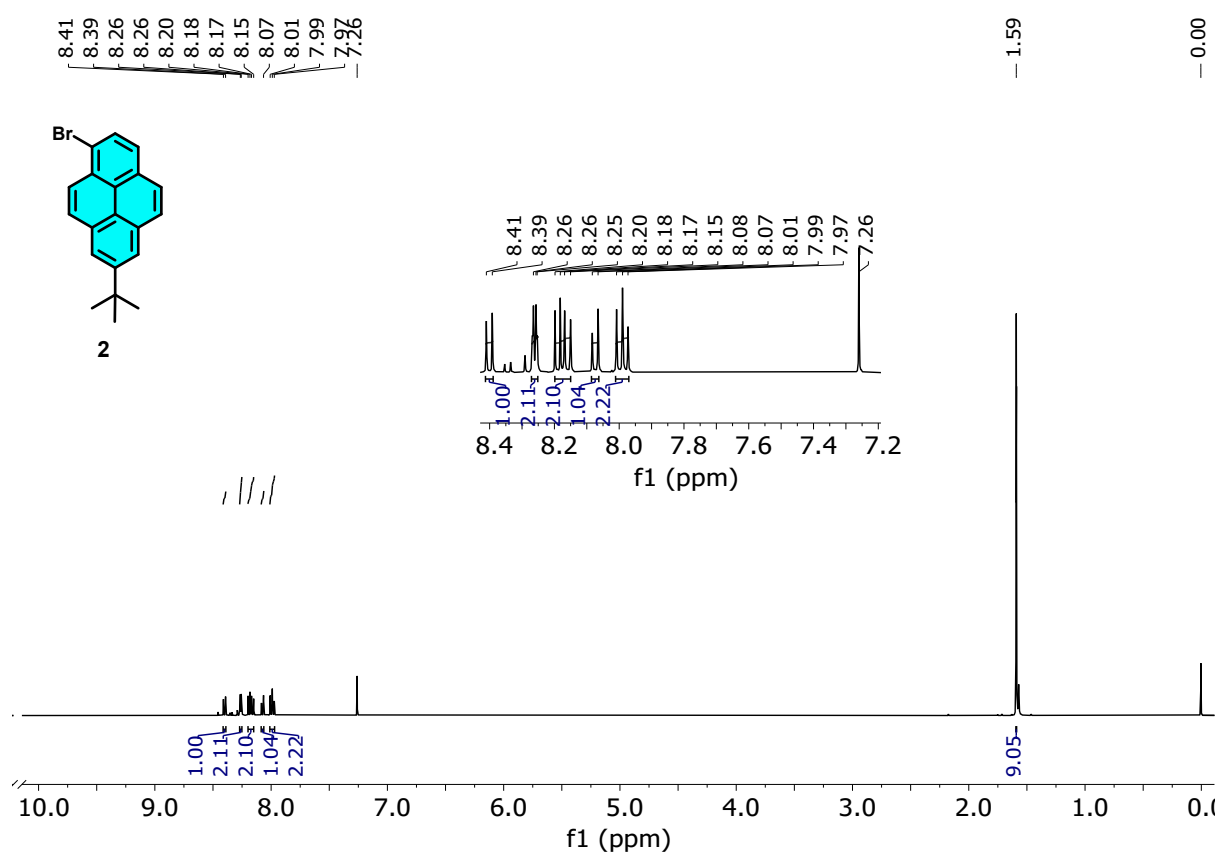

**Figure S13.** <sup>1</sup>H NMR (500 MHz, CDCl<sub>3</sub>) of **2**.

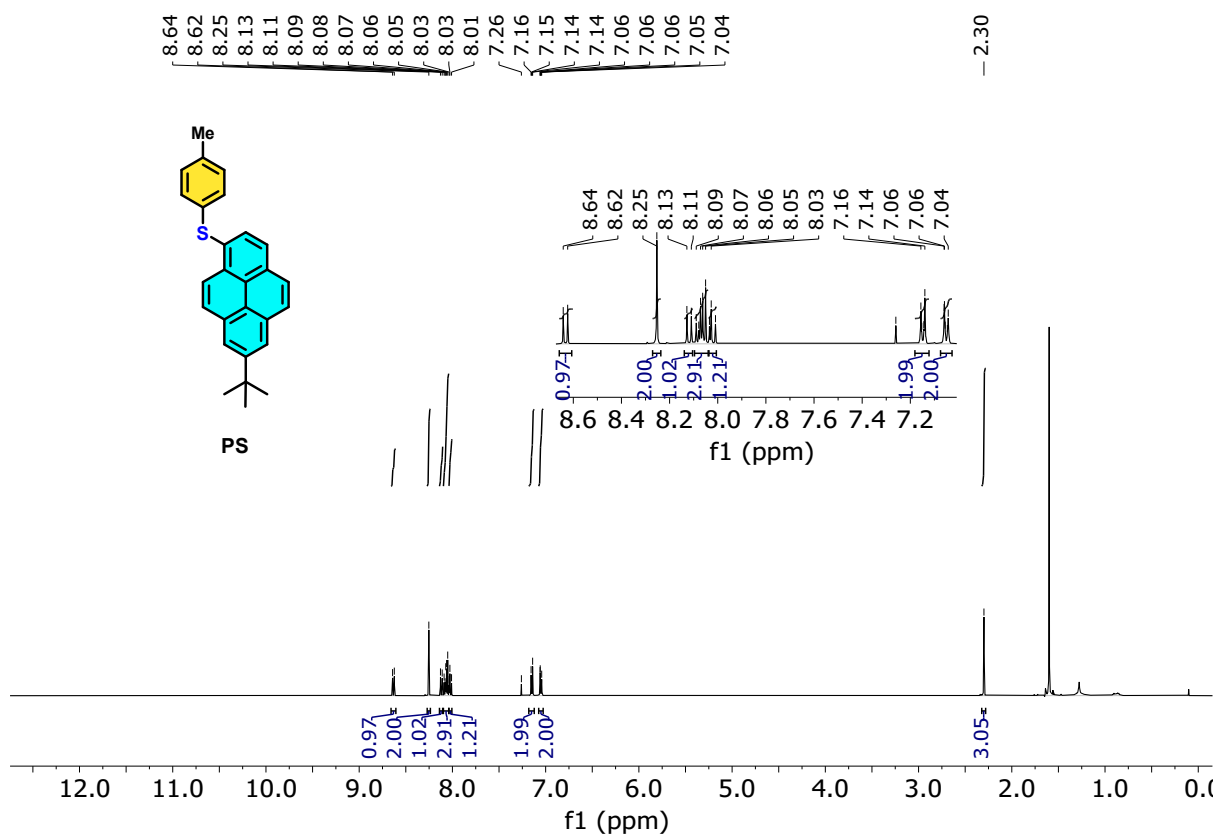

Figure S14. <sup>1</sup>H NMR (500 MHz, CDCl<sub>3</sub>) of PS.

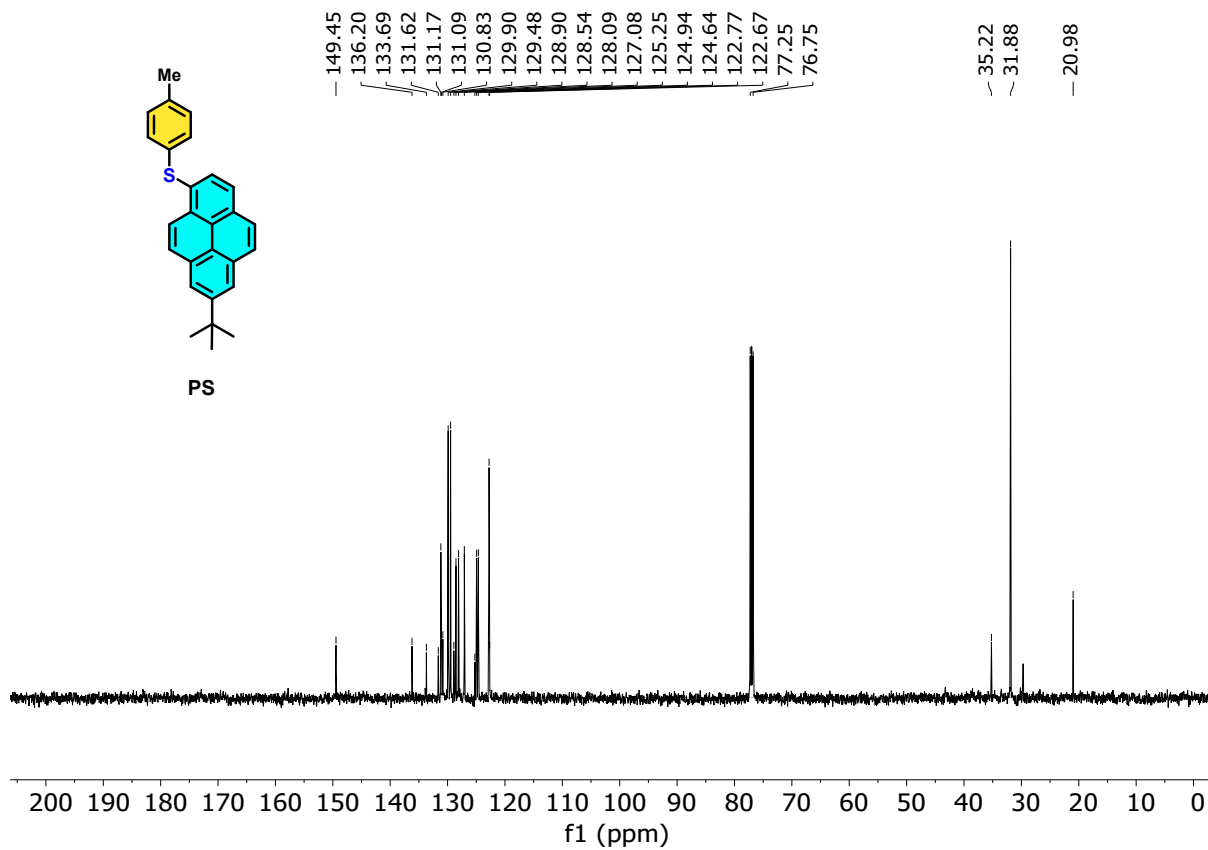

Figure S15. <sup>13</sup>C NMR (125 MHz, CDCl<sub>3</sub>) of PS.

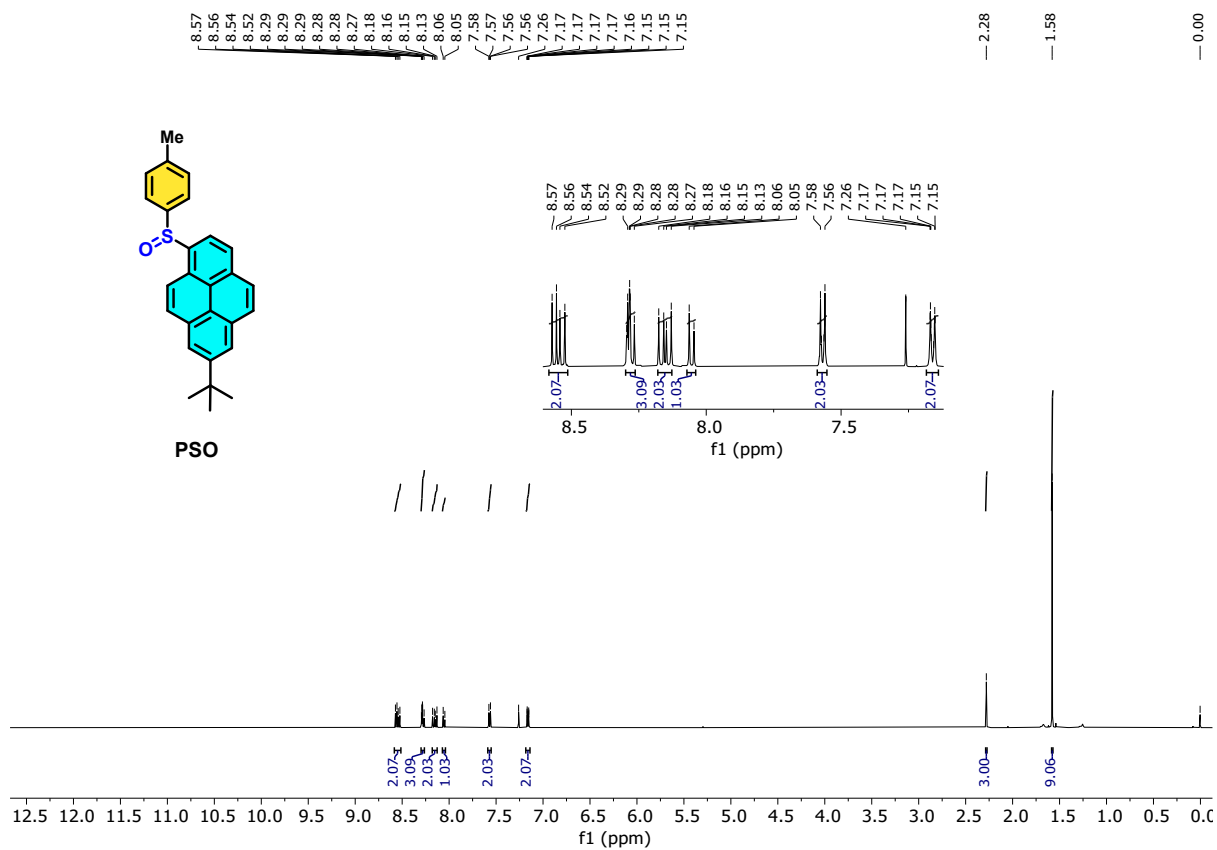

**Figure S16.** <sup>1</sup>H NMR (500 MHz, CDCl<sub>3</sub>) of PSO.

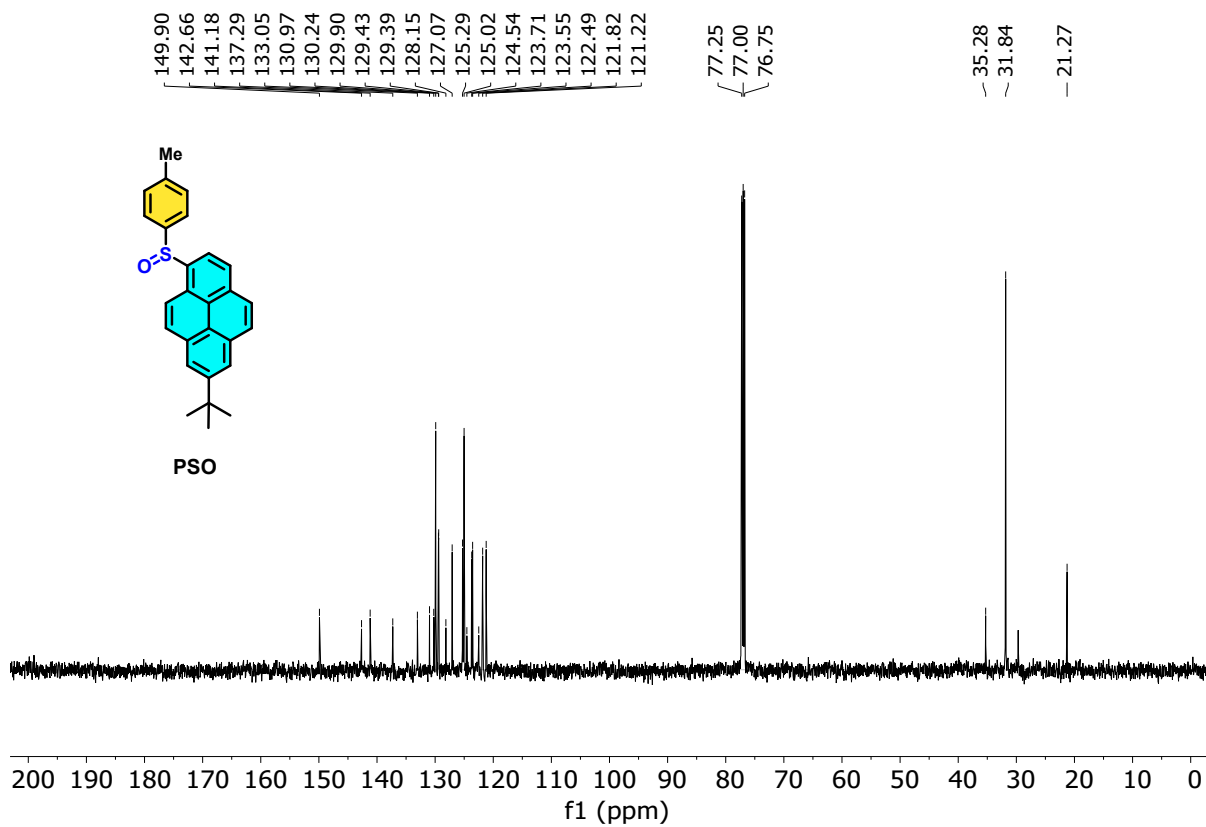

**Figure S17.** <sup>13</sup>C NMR (125 MHz, CDCl<sub>3</sub>) of PSO.

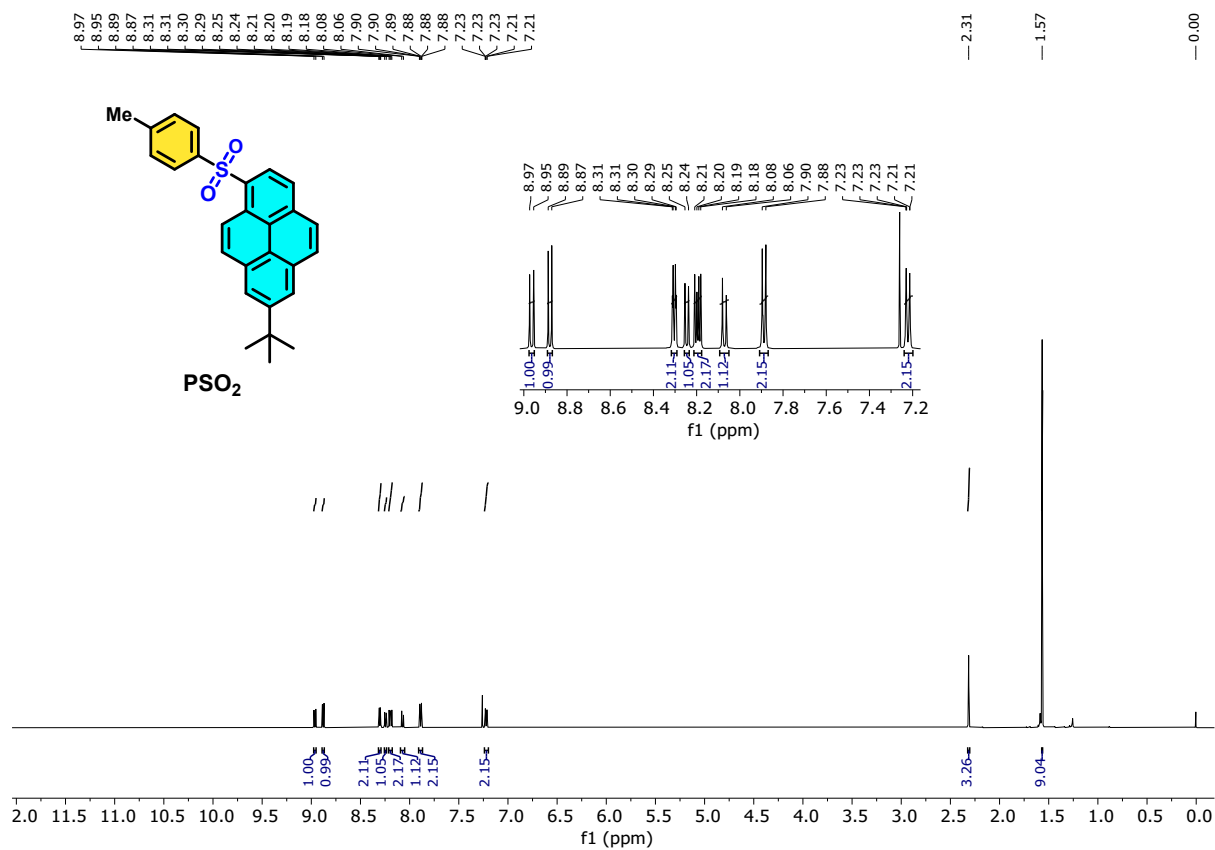

**Figure S18.** <sup>1</sup>H NMR (500 MHz, CDCl<sub>3</sub>) of PSO<sub>2</sub>.

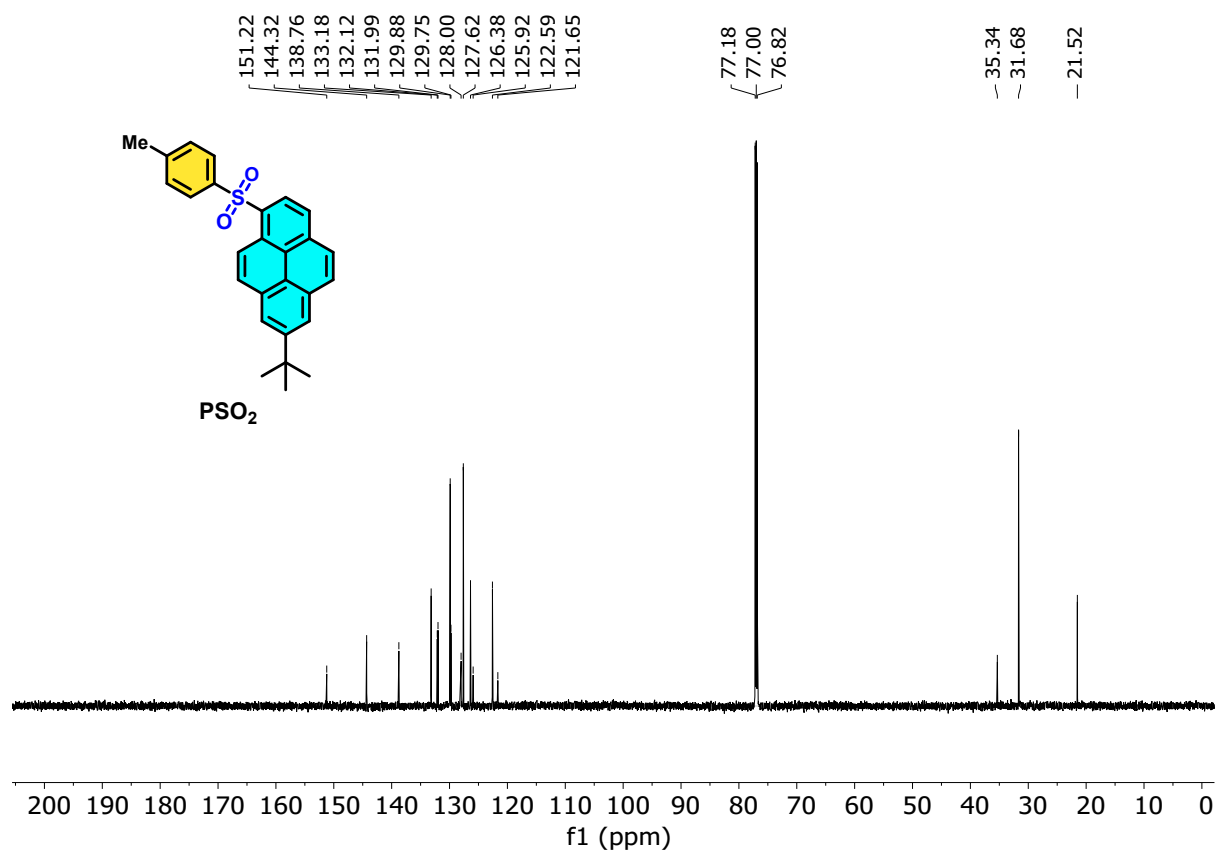

**Figure S19.** <sup>13</sup>C NMR (125 MHz, CDCl<sub>3</sub>) of PSO<sub>2</sub>.

## References

1. F. Neese, *Wiley Interdiscip. Rev.: Comput. Mol. Sci.*, 2025, **15**, 2, e70019.
2. T. Lu, *J. Chem. Phys.*, 2024, **161**, 082503.
3. L. Djordjevic, C. Valentini, N. Demitri, C. Meziere, M. Allain, M. Salle, A. Folli, D. Murphy, S. Manas-Valero, E. Coronado, D. Bonifazi, *Angew. Chem., Int. Ed.*, 2020, **59**, 4106-4114.
4. J. Han, L. Wang, Y. Zhang, Y. Li, J. Wang, *Org. Lett.* 2021, **23**, 8688-8693.
